# Supplementary material
Source: MDPI journal article supplement (https://www.mdpi.com/2073-4433/14/1/94)
Supplement: s1 [file s1]

## Supplementary Materials:

Table S1. The concentration of speciated IVOCs.

| Compound                               | Concentration | bins | Group                         |
|----------------------------------------|---------------|------|-------------------------------|
| 1,3-Butadiene, 1,1,2,3,4,4-hexachloro- | 15.82±3.84    | B12  | halogenated compounds         |
| 1-Nonanol                              | 5.81±1.96     | B12  | oxygenated compounds          |
| Benzene, 1,2,4-trichloro-              | 5.01±3.58     | B12  | halogenated compounds         |
| C12                                    | 35.14±25.83   | B12  | alkanes                       |
| Methane, bis(2-chloroethoxy)-          | 17.04±0       | B12  | halogenated compounds         |
| Naphthalene                            | 158.93±156    | B12  | PAHs                          |
| Pentasiloxane, dodecamethyl-           | 1.47±1        | B12  | siloxanes                     |
| Phenol, 2,4-dichloro-                  | 3.66±3.6      | B12  | halogenated compounds         |
| C13                                    | 66.54±50.09   | B13  | alkanes                       |
| Cyclohexasiloxane, dodecamethyl-       | 11.38±8.45    | B13  | siloxanes                     |
| Hexachlorocyclopentadiene              | 1.79±1.48     | B13  | halogenated compounds         |
| Naphthalene, 2-methyl-                 | 43.65±41.23   | B13  | PAHs                          |
| Nonanoic acid                          | 65.88±20.7    | B13  | oxygenated compounds          |
| Phenol, 2,4,5-trichloro-               | 2.88±2.56     | B13  | halogenated compounds         |
| 1-Undecanol                            | 10.65±5.24    | B14  | oxygenated compounds          |
| Acenaphthylene                         | 2.18±3.41     | B14  | PAHs                          |
| C14                                    | 60.96±48.04   | B14  | alkanes                       |
| Dimethyl phthalate                     | 11.68±8.32    | B14  | phthalates                    |
| Naphthalene, 2-chloro-                 | 7.64±8.06     | B14  | halogenated compounds         |
| n-Decanoic acid                        | 12.41±11.52   | B14  | oxygenated compounds          |
| o-Nitroaniline                         | 4.05±1.35     | B14  | nitrogen-containing compounds |
| Phenol, 2,4,6-trichloro-               | 2.95±1.86     | B14  | halogenated compounds         |
| Acenaphthene                           | 3.59±3.73     | B15  | PAHs                          |
| Benzene, 1-methyl-2,4-dinitro-         | 4.45±1.71     | B15  | nitrogen-containing compounds |
| C15                                    | 30.79±23.49   | B15  | alkanes                       |
| m-Nitroaniline                         | 13.57±3.41    | B15  | nitrogen-containing compounds |
| Undecanoic acid                        | 19.84±17.3    | B15  | oxygenated compounds          |
| Azobenzene                             | 9.06±6.31     | B16  | nitrogen-containing compounds |
| Benzene, 1-chloro-4-phenoxy-           | 1.51±2.85     | B16  | halogenated compounds         |
| C16                                    | 23.45±17.28   | B16  | alkanes                       |
| Diethyl Phthalate                      | 2.36±1.55     | B16  | phthalates                    |
| Dodecanoic acid                        | 8.22±4.74     | B16  | oxygenated compounds          |
| Fluorene                               | 4.74±2.38     | B16  | PAHs                          |
| p-Nitroaniline                         | 4.52±0        | B16  | nitrogen-containing compounds |
| Benzene, 1-bromo-4-phenoxy-            | 2.31±2.17     | B17  | halogenated compounds         |
| Benzene, hexachloro-                   | 0.48±0.49     | B17  | halogenated compounds         |
| C17                                    | 18.89±13.9    | B17  | alkanes                       |
| Pentadecane, 2,6,10,14-tetramethyl-    | 8.29±6.19     | B17  | alkanes                       |
| Phenol, pentachloro-                   | 0.72±0.22     | B17  | halogenated compounds         |
| Anthracene                             | 0.6±1.73      | B18  | PAHs                          |
| C18                                    | 14.89±11.27   | B18  | alkanes                       |
| Hexadecane, 2,6,10,14-tetramethyl-     | 7.56±6.35     | B18  | alkanes                       |
| Phenanthrene                           | 5.79±4.34     | B18  | PAHs                          |
| Tetradecanoic acid                     | 7.92±11.29    | B18  | oxygenated compounds          |
| C19                                    | 4.79±6.94     | B19  | alkanes                       |
| Pentadecanoic acid                     | 5.73±3.32     | B19  | oxygenated compounds          |

|                     |             |     |                      |
|---------------------|-------------|-----|----------------------|
| C20                 | 3.43±3.87   | B20 | alkanes              |
| Dibutyl phthalate   | 11.96±14.95 | B20 | phthalates           |
| n-Hexadecanoic acid | 50.27±78.07 | B20 | oxygenated compounds |
| C21                 | 2.58±2.81   | B21 | alkanes              |
| Fluoranthene        | 0.73±0.56   | B21 | PAHs                 |
| Pyrene              | 0.46±0.46   | B21 | PAHs                 |
| C22                 | 2.72±4.28   | B22 | alkanes              |
| Octadecanoic acid   | 3.64±2.14   | B22 | oxygenated compounds |

Table S2. The concentration of speciated SVOCs.

| Compound                    | Concentration | Bins | Class      |
|-----------------------------|---------------|------|------------|
| Benzyl butyl phthalate      | 0.09±0.04     | B23  | phthalates |
| C23                         | 4.56±10.75    | B23  | alkanes    |
| Benz[a]anthracene           | 0.32±0.31     | B24  | PAHs       |
| C24                         | 9.64±22.9     | B24  | alkanes    |
| Bis(2-ethylhexyl) phthalate | 3.74±4.56     | B25  | phthalates |
| C25                         | 8.41±20.73    | B25  | alkanes    |
| Chrysene                    | 0.31±0.28     | B25  | PAHs       |
| C26                         | 9.82±23.97    | B26  | alkanes    |
| C27                         | 8.27±17.84    | B27  | alkanes    |
| Di-n-octyl phthalate        | 0.41±0.42     | B27  | phthalates |
| Benzo[b]fluoranthene        | 0.38±0.34     | B28  | PAHs       |
| Benzo[k]fluoranthene        | 0.29±0.18     | B28  | PAHs       |
| C28                         | 6.35±14.39    | B28  | alkanes    |
| C29                         | 6.56±12.19    | B29  | alkanes    |
| C30                         | 6.08±13.6     | B30  | alkanes    |
| C31                         | 5.41±10.26    | B31  | alkanes    |
| Benzo[ghi]perylene          | 0.45±0.11     | B32  | PAHs       |
| C32                         | 2.67±5.36     | B32  | alkanes    |
| Dibenz[a,h]anthracene       | 1.17±1        | B32  | PAHs       |
| C33                         | 1.7±2.93      | B33  | alkanes    |
| C34                         | 1.5±2.44      | B34  | alkanes    |
| C35                         | 0.91±1.26     | B35  | alkanes    |
| C36                         | 0.55±0.63     | B36  | alkanes    |

**Table S3.** The correlation coefficients of volatile bins distribution with temperature, relative humidity, and O<sub>3</sub>.

|     | O <sub>3</sub> (μg m <sup>-3</sup> ) | Temperature(°C) | Relative Humidity (%) |
|-----|--------------------------------------|-----------------|-----------------------|
| B12 | -0.29435                             | 0.349131        | -0.07357              |
| B13 | -0.05853                             | 0.390858        | 0.118873              |
| B14 | 0.133181                             | 0.418604        | 0.194536              |
| B15 | -0.11098                             | 0.51634         | 0.217318              |
| B16 | 0.40647                              | 0.23762         | 0.635699              |
| B17 | 0.077111                             | 0.403617        | 0.526654              |
| B18 | -0.18712                             | 0.068422        | 0.157087              |
| B19 | -0.38339                             | 0.181627        | -0.18726              |
| B20 | -0.36705                             | -0.49587        | -0.40378              |
| B21 | -0.00338                             | 0.355574        | 0.037737              |
| B22 | 0.478203                             | -0.12399        | 0.229875              |
| B23 | 0.528445                             | 0.071562        | 0.264346              |
| B24 | 0.506123                             | 0.040164        | 0.257279              |
| B25 | 0.41248                              | -0.10437        | 0.258181              |
| B26 | 0.41849                              | -0.07386        | 0.248326              |
| B27 | 0.31348                              | -0.17272        | 0.205697              |
| B28 | 0.236068                             | -0.18653        | 0.178398              |
| B29 | 0.096025                             | -0.32404        | 0.069093              |
| B30 | 0.078671                             | -0.27593        | 0.104513              |
| B31 | -0.02649                             | -0.35267        | 0.054204              |
| B32 | -0.04272                             | -0.20937        | 0.113027              |
| B33 | -0.07848                             | -0.35865        | 0.129658              |
| B34 | -0.11866                             | -0.34249        | 0.201598              |
| B35 | -0.2465                              | -0.4028         | 0.178758              |
| B36 | -0.22969                             | -0.37121        | 0.23129               |

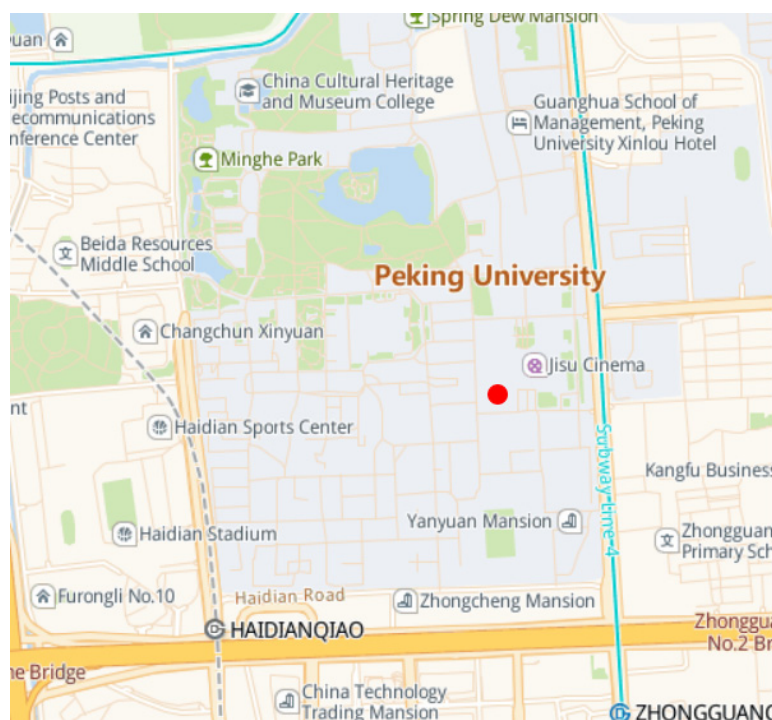

**Figure S1.** The location of the sample site.

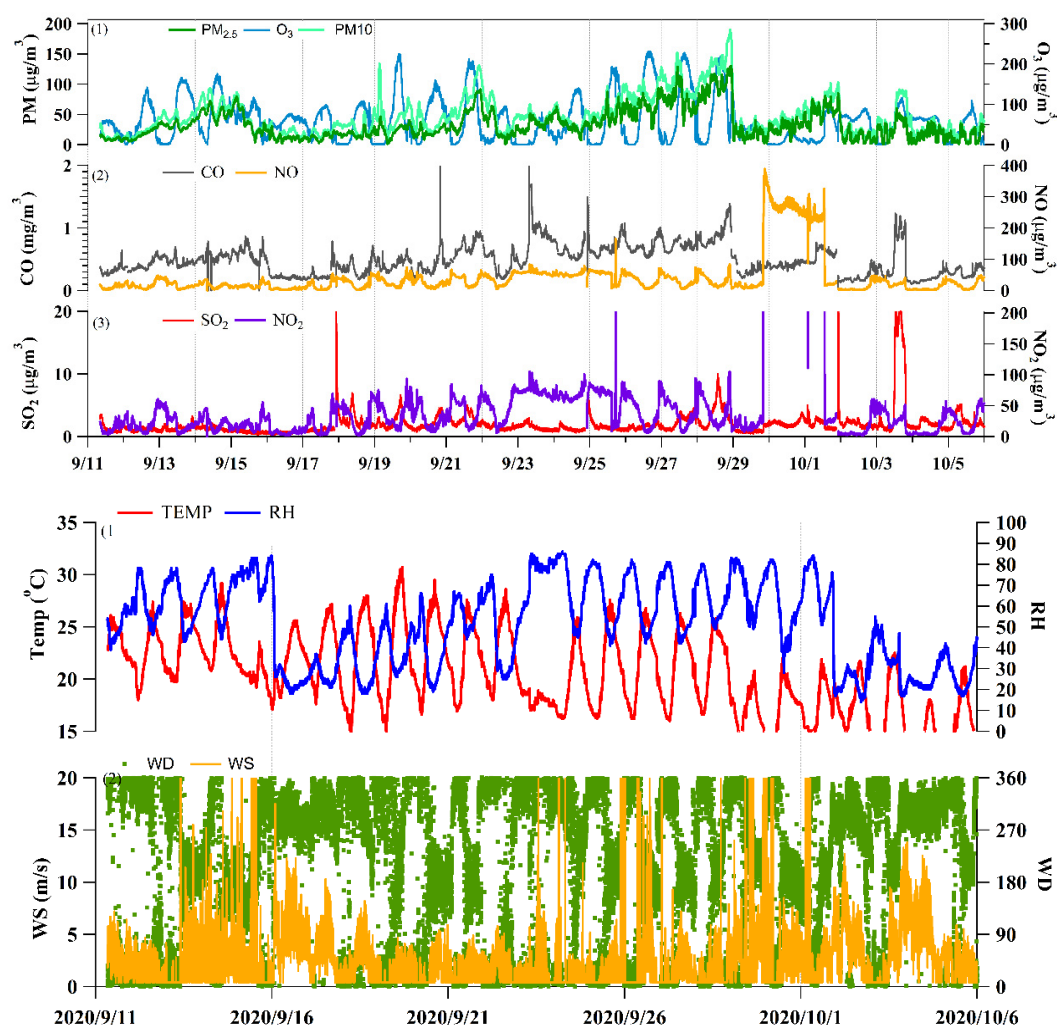

**Figure S2.** Gaseous pollutants and meteorological conditions during the observation period.

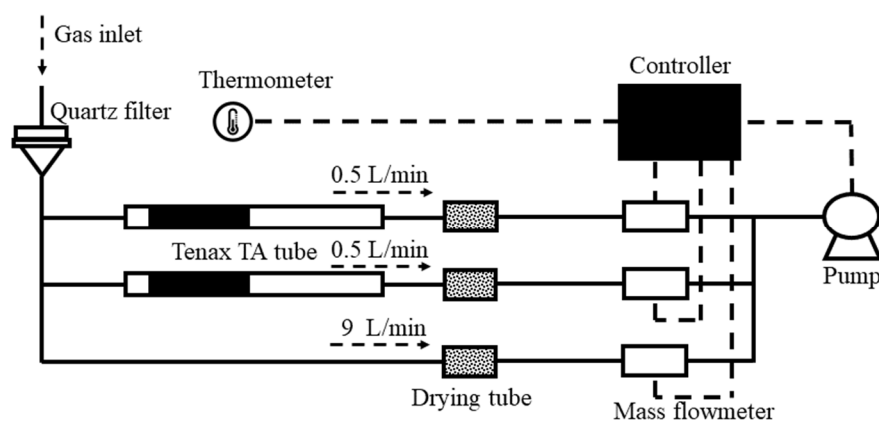

**Figure S3.** Schematic diagram of gas and particle phase sampling device.

As shown in Figure S3, ambient samples pass through the gas inlet (inert steel pipe) at a total flow rate of 10 L/min to a quartz 47 mm filter (Whatman®- Sigma-Aldrich), which was used to collect particulate constituents, and then split into three paths, two of which pass through two adsorption tubes (Gerstel 6 mm OD, 4.5 mm ID glass tube filled with ~290 mg Tenax TA) at a flow rate of 0.5 L/min for the collection of gaseous constituents, together with a bypass flow rate of 9 L/min.
